# Supplementary material for: Detection of post-vaccination enhanced dengue virus infection in macaques: An improved model for early assessment of dengue vaccines
Source: PLoS Pathog. 2019 Apr 22;15(4):e1007721. doi: 10.1371/journal.ppat.1007721 (PMC6497418; doi:10.1371/journal.ppat.1007721)
Supplement: S2 Data — (XLSX) [file ppat.1007721.s015.xlsx]

## Sheet: compil NHP3 bis
no available aliquot											acquisition and analyse using Bioplex Manager version 5, 4 parameters
extrapolated values
For 1 out of the 2 duplicates the number of acquired beads <30-only the value for which number of beads>30 was taken into account
For 2 out of the 2 duplicates the number of acquired beads ≤30-the value was not taken into account
Standard curve not generated
	Group	Group 1 Brazilian DEN1 0111/2011					Group 1 Brazilian DEN2 0126/2010					Group 2 Brazilian DEN1 0111/2011					Group 2 Brazilian DEN2 0126/2010					Group 4 Brazilian DEN1 0111/2011					Group 4 Brazilian DEN2 0126/2010						Group 3 Brazilian DEN2 0126/2010					Group 3 WRAIR S16803 DENV2				Group 5 WRAIR S16803 DENV2					Group 5 Brazilian DEN2 0126/2010
	Monkey	AF 104	AF 124	AF 125	AG 101	AG 119	AF 138	AG 125	AG 135	AG 169	AG 177	AF 50	AH 44	AE 87	AE107	AF 167	AF 122	AG 35	AG 77	AG117	AH69	AF 92	AG 48	AG 57	AG 71	AG 105	AG 148	AH 43	AH 57	AH 63	AH 73		AH 85	AH 7	AG 122	AG 167	AG 10	AG 78	AH 71	AG 179	AG 163	AG36	AE6	AG45	AH37	AC41	AG46	AG128	AG115
	Genre	F	F	M	M	M	F	M	M	M	M	F	F	M	M	M	F	M	M	M	M	F	F	M	M	M	F	M	M	M	M		M	M	F	M	F	F	M	M	M	F	F	M	M	M	F	F	M
NHP - G-CSF (18)	0	58.395	74.9	79.2	102.335	74.9	52.77	71.54	58.395		51.43	100.435	102.335	102.335	405.37	95.37	88.045	30.83	88.045	11.805		127.87	146.24	127.87	88.045	58.265	60.61	64.54	74.9	51.43	44.105		49.46	22.685	22.685	1.05	1.05	13.915	22.685	1.05	1.05	37.07	1.05	22.685	13.915	1.05	1.05	1.05	22.685
	1	1.05	1.05	1.05	1.05	10.17	35.115	1.05	19.29	50.94	10.17	25.995	38.93	59.675	380.665	1.05	1.05	10.17	35.115	10.17		10.17	1.05	1.05	18.67	38.93	10.17	1.05		25.995	19.29		41.85	1.05	1.05	1.05	1.05	1.05	1.05	1.05	1.05	1.05	1.05	1.05	1.05	1.05	1.05	1.05	1.05
	4																																44.32	119.605	1.05	22.685	22.685	1.05	1.05	22.685	1.05	22.685	1.05	37.07	1.05	1.05	1.05	37.07	1.05
	5	1.05	29.17	31.3	29.17	16.175	1.05	16.175	16.175	1.05	1.05	1.05	1.05	1.05	271.44	62.595			1.05	8.51	1.05	1.05	16.175			1.05	1.05	1.05	1.05	1.05	1.05		1.05		1.05	1.05	57.955	37.225	23.525	1.05	1.05	1.05	1.05	1.05	1.05	23.525	1.05	23.525	1.05
	8	35.36	11.805	89.85	15.195	35.36	18.205	40.415	11.805		1.05	15.195	18.205	47.22	357.97	40.415		1.05	40.52	1.05	18.205	1.05	18.205		35.175	7.83	21.595	18.205		11.805	18.205		1.05	1.05	1.05	1.05	1.05	1.05	1.05	1.05	1.05	1.05	1.05	1.05	1.05	1.05	1.05	1.05	1.05
	10	27.665	24.385	102.775	7.61	30.22	42.575	67.81	27.665	46.03	1.05	1.05	4.33	1.05	339.005	1.05		39.295	1.05	39.295	77.12	27.665	42.575	62.63	1.05	4.33	15.635	7.61	32.14	47.72			48.285	73.4	48.285	1.05	125.765	37.225	57.955	1.05	37.225	1.05	287.43	66.715	102.995	57.955	1.05	1.05	73.4
	14		74.9	152.095	95.37	44.105	89.19	60.61	58.395	3.565	25.995	38.93		50.555	278.335	38.93		10.17	10.17	38.93	121.16													22.925		1.05			1.05	1.05	29.17			1.05		1.05	58.26		29.765
NHP - GM-CSF (14)	0	0.9	0.9	0.56	0.9	0.9	0.9	0.9	0.9	0.9	0.9	0.9	0.9	0.9	0.9	0.9	0.9	0.9	0.9	0.56	0.9	0.9	0.9	0.9	0.9	0.9	0.9	0.9	0.9	0.9	0.9		0.31	0.48	0.495	0.14	0.6	0.495	0.6	0.09	0.6	0.195	0.495	0.495	0.3	0.45	0.6	0.9	0.6
	1	0.555	0.555	0.9	0.72	0.385	0.98	0.385	1.25	0.55	0.55	0.22	0.555	1.25	0.72	0.55	0.72	1.25	0.9	0.9	0.55	0.465	1.07	0.72	0.465	1.07	1.07	0.9	1.07	0.55	0.72		0.955	0.585	0.675	0.88	0.405	0.5	0.695	0.52	0.675	1.17	0.9	0.785	0.14	0.86	0.14	0.695	0.695
	4	0.9	0.9	0.9	0.9	0.9	0.9	0.9	0.33	0.9	0.9	0.9	0.9	0.9	0.9	0.9	0.9	0.9	0.9	0.9	0.9	0.9	0.9	0.9	0.9	0.9	0.51	0.51	0.9	0.9	0.9		0.415	0.495	0.495	0.3	0.245	0.245	0.6	0.495	0.6	0.9	0.9	0.195	0.195	0.495	0.6	0.45	0.435
	5	0.575	1.15	1.34	1.35	0.575	0.855	0.95	1.74	0.83	1.045	1.74	0.95	1.15	0.95	1.15	0.76	0.575	0.76	0.95	1.15	0.22	0.76	0.39	0.765	0.575	0.965	0.95	0.22	0.22	0.76		0.46	0.9	0.9	0.9	0.46	0.46	0.9	0.705	0.46	0.9	0.9	0.9	0.9	0.46	0.46	0.46	0.9
	8	0.9	0.44	1.805	0.66	0.78	0.9	0.9	0.22	0.56	0.455	0.56	0.9	0.9	0.455	0.56	0.56	0.9	0.22	0.115	0.9	0.9	0.9	0.9	0.9	0.9	0.9	0.78	0.9	0.9	0.78		0.5	0.5	0.49	0.695	0.605	0.52	0.865	0.9	0.675	0.14	0.9	0.9	0.86	0.52	0.695	0.52	0.49
	10	4.42	1.76	1.575	1.225	1.75	1.055	1.225	1.935	1.4	1.225	1.585	1.225	1.05	1.135	0.88	1.4	1.4	1.05	1.585	1.225	1.225	2.305	1.055	1.575	1.225	1.225	0.57	1.05	0.88	1.75		0.9	0.46	0.9	0.355	0.9	0.9	0.46	0.02	0.9	0.9	0.46	0.46	0.9	0.9	0.46	0.9	0.9
	14		0.9	0.9	0.9	0.9	0.9	0.9	0.9	0.9	0.725	0.55		0.385	0.55	0.385		0.555	0.55	0.385	0.72				0.9	0.9		0.9	0.9	0.9	0.9		0.9	0.76		1.15			0.855	0.765	0.965			0.855	0.765	0.765	0.455		0.9
NHP - IFNG (20)	0	0.8	0.8	8.07	0.8	0.8	0.8	0.8	0.8	0.8	0.8	0.8	0.8	0.8	380.355	0.8	0.8	0.8	0.8	0.8	0.8	0.8	0.8	0.8	0.8	0.8	0.8	0.8	0.8	0.8	0.8		15.725	0.8	0.8	0.8	0.8	0.8	0.8	0.8	0.8	0.8	0.8	0.8	0.8	0.8	0.8	0.8	0.8
	1	0.8	0.505	2.89	0.8	0.8	0.8	0.8	0.8	0.8	0.8	0.8	0.8	0.8	294.05	0.8	0.8	0.8	0.8	0.8	0.8	0.505	0.8	0.8	0.8	0.8	0.8	0.8	0.8	0.8	0.8		32.17	0.8	0.8	0.8	0.8	0.8	0.8	0.8	0.8	0.8	0.8	0.8	0.805	0.8	0.8	0.8	0.8
	4	0.8	0.885	3.02	0.8	0.8	0.8	0.8	0.8	0.8	0.8	0.8	0.8	0.8	225.105	0.8	0.97	0.97	0.885	0.8	0.8	0.8	0.8	0.8	0.8	0.8	1.145	0.8	0.8	0.8	0.8		4.775	0.8	0.8	0.8	0.8	0.8	0.8	0.8	0.8	0.8	0.8	0.8	0.8	0.8	0.8	0.8	0.8
	5	1.9	1.9	12.31	0.84	2.43	0.84	0.31	0.84	0.8	0.31	0.555	0.8	0.8	296.88	3.735	1.37	0.8	1.085	1.37	6.61	0.8	0.555	0.8	0.555	0.8	0.8	0.8	0.8	0.8	0.8		26.02	0.825	1.615	6.695	5.305	1.615	0.8	12.675	2.375	0.8	0.8	0.825	0.8	0.8	0.8	0.825	0.8
	8	0.99	3.77	34.385	0.71	0.99	0.61	0.8	0.8	0.61	0.61	1.18	0.8	0.61	336.365	0.61	0.8	0.8	1.56	0.61	1.55	0.8	0.8	0.8	0.8	0.8	0.8	0.9	0.8	0.8	0.61		23.86	0.8	0.8	0.8	0.805	0.8	0.805	0.8	0.8	0.8	0.8	0.8	0.8	0.8	0.8	0.8	0.8
	10	1.735	1.48	9.075	0.8	0.545	2.08	0.545	0.545	1.735	0.8	0.545	0.8	0.8	355.6	0.545	0.8	0.8	0.8	0.545	0.8	1.49	0.545	0.8	0.545	0.545	0.545	1.145	0.545	1.145	0.8		20.845	0.8	0.8	0.8	0.825	0.8	0.8	0.8	0.825	0.8	0.8	0.825	0.8	0.8	0.825	0.8	0.8
	14		0.8	0.5	0.8	0.8	0.8	0.8	0.8	0.8	0.8	0.8		0.8	300.8	0.8		0.8	0.8	0.8	0.885				0.8	0.885		0.8	0.8	0.8	0.8		20.855	0.555		1.085			0.8	0.8	1.085			0.8	0.8	1.085	1.18		0.8
NHP - IL1b (46)	0	0.6	0.6	0.6	0.6	0.6	0.6	0.6	0.6	0.6	0.6	0.6	0.6	0.6	74.995	0.6	0.6	0.6	0.6	0.6	0.6	0.6	0.6	0.6	0.6	0.6	0.6	0.6	0.6	0.6	0.6		0.6	0.6	0.6	0.6	0.6	0.6	0.6	0.6	0.6	0.6	0.6	0.6	0.6	0.6	0.6	0.6	0.6
	1	0.6	0.49	0.6	0.6	0.6	0.6	0.6	0.6	0.6	0.6	0.6	0.6	0.6	60.285	0.6	0.6	0.6	0.6	0.6	0.6	0.6	0.6	0.6	0.3	0.6	0.6	0.6	0.6	0.37	0.6		0.6	0.6	0.345	0.6	0.6	0.6	0.6	0.6	0.6	0.6	0.6	0.6	0.345	0.6	0.6	0.6	0.6
	4	0.6	0.6	0.6	0.6	0.6	0.6	0.6	0.6	0.6	0.6	0.6	0.6	0.6	45.16	0.6	0.6	0.6	0.6	0.6	0.6	0.6	0.6	0.6	0.6	0.6	0.6	0.6	0.6	0.6	0.6		0.6	0.6	0.6	0.6	0.6	0.6	0.6	0.6	0.6	0.6	0.6	0.6	0.6	0.6	0.6	0.6	0.6
	5	0.6	0.55	0.6	0.6	0.6	0.6	0.6	0.6	0.6	0.6	0.6	0.6	0.36	75.51	0.6	0.6	0.6	0.6	0.6	0.6	0.6	0.6	0.6	0.6	0.6	0.6	0.6	0.6	0.525	0.6		0.6	0.6	0.6	0.6	0.6	0.6	0.6	0.6	0.6	0.6	0.6	0.6	0.6	0.6	0.6	0.6	0.6
	8	0.6	0.31	0.6	0.6	0.6	0.6	0.6	0.6	0.6	0.6	0.6	0.6	0.6	69.53	0.6	0.6	0.6	0.6	0.6	0.6	0.6	0.6	0.6	0.34	0.6	0.6	0.6	0.6	0.255	0.6		0.6	0.6	0.6	0.6	0.745	0.6	0.6	0.6	0.6	0.6	0.445	0.395	0.445	0.6	0.6	0.445	0.6
	10	1.62	0.6	0.6	0.6	0.6	0.6	0.6	0.6	0.6	0.6	0.6	0.6	0.6	62.62	0.315	0.6	0.6	0.6	0.6	0.6	0.6	0.6	0.6	0.6	0.6	0.6	0.315	0.6	0.03	0.6		0.6	0.6	0.6	0.6	0.6	0.6	0.6	0.6	0.6	0.6	2.105	0.6	0.49	0.49	0.6	0.825	0.6
	14		0.6	0.6	0.6	0.6	0.6	0.6	0.6	0.6	0.6	0.6		0.6	61.7	0.6		0.6	0.6	0.6	0.6				0.6	0.6		0.6	0.6	0.6	0.6		0.6	0.23		0.6			0.36	0.6	0.6			0.6	0.6	0.6	0.6		0.515
NHP - IL2 (33)	0	1.05	1.9	0.92	1.035	1.035	15.465	1.05	1.915	3.43	1.05	1.05	1.05	1.05	82.05	3.375	1.05	2.665	1.05	1.61	1.05	1.05	1.05	1.05	1.05	1.05	2.78	3.545	1.05	1.05	1.05		5.85	3.485	1.585	1.585	2.04	2.68	2.12	0.945	0.945	3.24	0.945	3.24	5.185	2.68	1.48	0.84	1.05
	1	1.05	2.065	1.14	1.05	1.23	6.12	1.05	1.05	2.755	1.05	1.14	1.975	2.985	73.71	3.59	1.05	1.975	2.755	1.14	1.05	1.05	1.05	1.05	1.05	1.05	4.28	3.59	1.05	1.05	1.05		0.49	0.77	1.05	1.05	1.05	1.05	1.05	1.05	1.05	1.05	1.05	0.77	4.365	1.79	1.05	1.05	1.05
	4	1.05	1.05	1.05	1.05	0.975	5.5	1.05	1.05	1.05	1.05	1.05	1.05	1.05	59.865	0.975	1.05	1.05	1.05	1.05	1.05	1.05	1.05	0.9	1.05	1.05	2.4	1.05	1.05	1.05	1.05		2.805	2.145	0.945	3.2	2.145	1.48	2.12	3.05	1.05	1.765	0.84	1.175	4.005	3.155	1.175	5.41	0.945
	5	2.19	2.76	0.87	3.85	1.22	7.635	1.53	1.53	2.19	3.33	0.87	1.53	1.62	62.76	1.62	0.96	0.96	1.53	1.53	1.62	1.05	1.05	2.19	0.96	0.96	7.135	0.87	0.96	1.62	0.96		4.45	2.97	1.21	2.01	1.37	1.21	1.05	2.695	1.37	1.21	2.01	1.37	6.41	4.96	2.01	2.01	1.37
	8	1.285	1.975	2.3	1.61	3.73	6.32	1.05	0.985	0.92	0.985	1.61	2.265	1.675	72.74	2.89	1.05	2.2	0.985	0.985	1.05	1.05	0.985	1.675	0.985	1.05	7.51	2.2	1.61	2.2	0.92		1.05	1.05	1.05	0.77	1.05	1.05	1.05	1.05	1.05	1.05	1.05	1.42	3.385	1.485	1.05	1.05	1.05
	10	2.995	3.755	3.49	0.85	2.885	8.065	1.05	0.95	3.445	1.565	0.85	1.05	2.885	69.38	1.565	0.95	2.885	1.565	0.95	0.95	1.665	0.85	2.885	0.85	1.05	6.405	3.97	3.195	2.73	1.565		4.96	2.01	2.01	0.665	0.665	1.21	1.05	1.37	1.05	1.37	2.17	3.315	5.275	4.01	1.21	1.37	2.01
	14		1.05	1.05	1.915	1.05	8.38	1.05	1.05	1.05	1.05	1.14		1.14	67.035	1.05		1.23	1.05	1.05	1.05				1.05	1.05		1.05	7.12	1.05	14.6		1.05	3.025		0.96			2.19	0.87	2.19			6.645	2.76	1.62	2.265		3.165
NHP - IL6 (57)	0	0.8	0.8	3.48	0.8	0.8	0.8	0.8	0.8	0.8	0.8	0.8	0.8	0.8	28.925	0.8	0.8	0.8	0.8	0.8	0.8	0.8	0.8	0.69	0.8	0.8	0.8	0.8	0.8	0.8	0.8		0.8	1.875	0.8	0.8	0.8	0.8	0.8	0.8	0.8	0.8	0.8	0.8	0.8	0.8	0.8	0.8	0.8
	1	0.8	0.8	0.8	0.8	0.8	0.8	0.8	0.8	0.8	0.8	0.8	0.8	0.8	18.205	0.8	0.8	0.8	0.8	0.8	0.8	0.8	0.8	0.8	0.8	0.8	0.8	0.8	0.8	0.8	0.8		0.7	2.17	0.8	0.8	0.8	0.8	1.77	0.44	0.51	2.56	0.8	0.8	1.265	0.33	0.51	0.8	0.22
	4	0.8	0.8	0.8	0.8	0.8	0.8	0.8	0.8	0.8	0.8	0.8	0.8	0.8	13.5	0.8	0.8	0.8	0.8	0.8	0.8	0.8	0.8	0.43	0.8	0.8	0.8	0.8	0.8	0.8	0.8		0.8	0.8	0.8	0.8	0.8	0.8	0.8	0.8	0.8	0.8	0.8	0.8	0.8	0.8	0.8	2.91	0.8
	5	0.8	0.8	4.405	0.575	0.8	0.8	0.8	0.8	0.8	0.8	0.8	0.445	1.23	20.445	0.35	0.445	0.8	0.8	0.8	0.35	0.8	0.8	0.8	0.8	0.8	0.8	0.8	0.71	0.8	0.8		0.8	1.875	0.8	0.8	0.8	0.8	0.8	11.43	0.8	2	0.8	0.8	0.575	0.8	0.8	0.8	0.8
	8	0.8	0.8	5.265	0.8	0.8	4.44	0.8	0.8	0.13	3.96	0.8	0.8	0.8	18.95	0.8	0.8	0.8	0.8	0.8	0.8	0.8	0.8	0.75	0.8	0.8	0.8	0.8	0.8	0.375	0.8		0.275	3.63	0.8	0.33	0.725	0.755	0.8	0.62	0.8	2.95	0.8	0.8	0.44	0.22	0.51	0.8	13.565
	10	2.105	0.8	14.9	0.44	0.8	0.46	0.8	0.12	0.59	1.09	0.8	0.8	0.86	16.75	0.8	0.8	0.8	0.8	0.83	0.8	0.8	0.8	1.32	0.8	0.8	0.8	0.8	0.8	0.8	0.8		0.8	2.57	2.505	0.8	0.8	0.8	0.5	0.8	0.8	5.905	0.8	0.8	0.8	0.8	0.8	0.8	0.8
	14		0.8	0.8	0.8	0.8	0.8	0.8	0.8	0.8	0.8	0.8		0.8	21.38	0.8		0.8	0.8	0.8	0.8				0.8	0.8		0.8	0.8	0.8	0.8		0.8	0.935		0.8			0.8	0.8	0.8			0.8	0.8	0.8	0.8		0.8
NHP - IL8 (63)	0	1113.97	2563.32	1059.88	2980.68	5439.39	2233.72	2253.1	1664.59	1082.95	2959.68	3572.24	3149.59	2276.53	3227.78	1343.95	2942.36	3672.15	6045.46	1149.4	1764.89	2207.76	2297.03	1413.52	2954.86	4666.07	1028.02	4148.55	2756.34	3445.89	1250.98		1634.79	1334.31	1918.12	4001.68	5101.51	2610.11	1297.97	2794.74	1363.86	5756.25	2748.63	703.94	3520.47	2187.9	2415.64	1489.09	882.795
	1	213.38	666.52	140.465	398.755	2919.14	2945.64	2242.27	580.05	1582.56	2448.73	2416.47	2295.01	2002.09	2137.72	897.6	5312.25	3763.86	3746.53	729.415	1574.67	2442.45	1942.31	1491.01	2088.4	3513.33	1969.73	3183.78	2397.97	3004.22	815.195		1074.87	2935.88	2461.91	3694.38	4436.6	3508.55	1610.87	1413.84	1283.13	5397.89	3778.71	826.61	3085.66	1911.24	2178.18	1041.96	1657.09
	4	1471.87	4349.49	1314.57	2470.94	3873.82	3126.64	2532.01	1246.3	2408.06	2923.38	2987.4	2396.74	1755.51	2491.87	1239.11	6035.97	4696.61	5202.66	1635.61	1523.36	1273.39	2260.4	1815.69	3050.16	3682.49	1464.16	3335.36	2494.28	3856.22	1373.76		1182.38	3355.99	3517.18	3882.44	3634.51	2643.25	1267.26	1691.84	1650.39	6525.99	4252.8	1109.99	4080.37	1916.87	1831.56	1051.26	1909.45
	5	1591.27	5426.3	1480.94	2314.82	3948.74	3023.15	2146.09	1699.9	2100.2	2428.36	3525.6	2498	1987.99	3465.22	1418.43	6295.45	4932.81	4432.38	2167.39	1715.05	2588.07	3123.95	2657.59	3224.01	5383.93	1970.1	3066.04	1517.77	4219.65	997.205		2292.99	3892.82	2798.75	3704.72	3801.99	2930.34	2124.8	1656.4	1823	6060.32	3783.24	1268.26	4783.02	3087.11	2381.31	1981.93	2020.91
	8	2124.8	3408.74	654.245	3049.43	3504.24	2821.03	3344.32	1925.07	2953.47	3562.86	3792.16	3053.73	2478.59	3597.97	1746.75	5990.29	5320.27	5420.68	1803.05	2000.1	2711.52	3306.65	2032.69	3351.06	5534.14	1775.35	2795.49	2594.73	3443.99	1693.01		2785.62	3424.69	3815.9	4665.69	4423.06	3465.14	2558.31	2353.27	2269.43	6259.66	5062.1	1581.71	5650.2	3830.79	3583.41	2332.32	2098.11
	10	2060.49	7765.55	284	3720.15	4422.15	3441.44	4642.68	1458.17	2710.61	4812.59	3817.01	3787.63	2949.65	4329.33	2107.17	6905	5788.08	5490.49	2034.47	2678.57	3930.02	3495.97	2071.95	3925.53	8187.95	2446.77	3384.69	2461.78	4386.01	1943.68		2931.82	2031.14	2745.97	4821.6	4138.83	3106.84	2461.86	3068.61	2544.67	4970.99	4178.68	1600.28	5084.36	2978.53	3432.58	1774.62	2270.39
	14		6765.1	1253.45	3787.35	4636.93	3217.56	3918.01	1611.51	2025.53	2866.99	2967.49		1800.8	2876.8	1161.26		3737.61	4527.2	2315.67	2529.7				3622.53	4526.76		3066.22	1653.03	3543.88	612		2153.74	2199.66		3919.64			1992.3	2518.66	2281.37			1220.6	4822.92	2028.76	2967.03		1548
NHP - IL10 (35)	0	3.2	3.2	14.77	3.2	3.2	3.2	3.2	3.2	0.75	3.2	3.2	3.2	3.2	1176.2	3.2	3.2	3.2	3.2	3.2	3.2	3.2	3.2	3.2	3.2	3.2	3.2	3.2	3.2	3.2	3.2		3.2	3.2	3.2	3.2	3.2	3.2	3.2	1.955	3.2	3.2	3.2	3.2	3.2	3.2	3.2	3.2	3.2
	1	3.2	3.2	2.985	3.2	3.2	3.2	3.2	3.2	2.11	3.2	3.2	3.2	2.985	397.42	3.2	2.985	3.2	3.2	2.985	3.2	2.985	2.985	3.2	3.2	3.2	3.2	3.2	2.985	3.2	3.2		3.2	2.31	3.2	3.2	2.31	3.2	3.2	3.2	3.2	3.2	3.2	3.2	7.79	3.2	3.2	3.2	3.2
	4	3.2	3.2	2.44	3.2	3.2	3.2	3.2	3.2	3.2	3.2	3.2	3.2	3.2	337.615	3.2	4.39	3.2	3.2	2.82	3.2	6.71	3.2	3.2	3.2	3.2	3.2	3.2	3.2	3.2	3.2		3.2	3.2	3.2	3.2	3.2	3.2	3.2	3.2	3.2	3.2	3.2	3.2	3.2	3.2	3.2	4.375	3.2
	5	5.26	10.875	209.95	18.405	25.95	3.405	2.375	3.405	3.2	7.13	3.2	3.2	3.2	488.295	2.375	7.13	9.005	7.13	9.005	46.81	4.23	3.2	3.2	3.2	3.2	3.2	4.23	3.2	2.475	3.2		3.2	3.68	3.2	1.335	13.725	4.81	3.2	99.685	3.2	2.865	3.2	3.2	3.2	3.2	3.2	2.865	3.2
	8	20.715	86.355	795.135	77.585	56.1	6.805	1.975	3.2	22.705	3.2	61.965	14.785	24.665	529.385	12.8	12.8	8.8	61.965	2.775	6.805	4	3.2	3.2	4	3.2	3.2	1.975	0.75	3.2	3.2		3.2	6.86	6.86	3.2	5.055	4.115	3.2	14.23	2.31	3.2	3.2	3.2	3.2	3.2	3.2	3.2	5.945
	10	21.75	29.955	53.19	14.62	18.165	14.665	9.38	9.38	13.745	12.86	21.75	11.12	16.405	486.835	11.12	11.12	14.62	14.62	11.18	11.985	18.165	16.38	10.295	18.165	12.86	13.735	9.38	12.88	12.88	14.62		2.865	3.2	3.2	2.865	2.865	3.2	3.2	3.2	3.2	3.2	3.2	2.865	3.2	2.865	3.2	3.2	3.2
	14		3.2	3.2	3.2	3.2	3.2	3.2	3.2	3.2	3.2	3.2		3.2	558.06	3.2		3.2	3.2	3.2	3.2				3.2	3.2		3.2	3.2	3.2	3.2		3.2	2.375		3.2			3.2	2.375	3.2			3.2	2.375	3.2	0.75		1.975
NHP - IL12/23 p40 (74)	0	0.75	2.22	19.71	0.75	40.43	0.75	0.75	0.75	1.405	264.11	0.75	0.75	0.75	1159.54	0.75	0.75	0.75	0.75	0.75	1.405	0.75	0.75	0.75	0.75	0.75	0.75	0.75	28.03	0.75	0.75		1.57	0.75	0.75	0.75	1.57	0.75	0.75	741.785	28.885	0.75	0.75	0.75	1.57	0.75	11.24	0.75	1.57
	1	0.75	4.525	2.46	0.75	33.47	0.75	0.75	0.75	0.75	119.9	0.75	0.75	4.525	1127.83	0.75	0.75	0.75	4.17	1.38	0.75	2.46	4.525	0.75	3.09	14.29	16.26	0.75	20.15	0.75	4.525		21.91	0.75	0.75	0.75	0.75	0.75	4.285	443.19	39.95	0.75	0.75	0.75	35.5	0.75	12.62	1.465	5.32
	4	0.75	32.645	0.75	0.75	26.85	0.75	0.75	0.75	0.75	118.93	0.75	0.75	0.75	914.6	0.75	0.75	0.75	0.75	0.75	0.75	0.75	0.75	0.75	0.75	0.75	2.17	0.75	23.9	0.75	0.75		0.75	0.75	0.75	0.75	7.425	1.57	1.57	428.675	38.585	0.75	0.75	0.75	0.75	0.75	4.565	0.75	10.21
	5	0.75	33.12	1.4	1.4	27.89	1.4	1.4	2.05	0.75	98.125	0.75	4.515	1.4	1033.86	10.415	0.75	0.75	6.98	1.4	3.865	3.865	8.145	19.345	4.515	3.865	9.29	0.75	3.865	0.75	0.75		11.2	0.75	0.75	3.175	18.85	0.75	5.975	349.285	49.465	0.75	0.75	3.175	28.41	0.75	21.235	3.175	18.85
	8	0.75	30.88	7.6	2.845	30.88	0.75	0.75	0.75	1.405	112.1	0.75	1.405	0.75	1182.33	4.175	0.75	0.75	4.175	0.75	0.75	7.6	2.06	1.405	1.405	0.75	2.06	1.405	26.51	0.75	0.75		2.82	0.75	0.75	0.75	4.285	0.75	0.75	283.825	44.355	0.75	0.75	1.785	33.26	0.75	17.32	0.75	5.32
	10	2.775	32.43	0.75	0.75	16.475	0.75	0.75	0.75	0.75	111.11	0.75	2.775	2.775	1033.33	2.775	0.75	0.75	0.75	0.75	0.75	9.18	6.99	4.8	0.75	2.775	5.84	0.75	17.485	0.75	0.75		3.175	0.75	0.75	1.61	5.975	3.175	9.835	245.37	33	0.75	33	8.4	37.245	0.75	35.09	10.99	18.85
	14		0.75	0.75	0.75	2.22	0.75	0.75	0.75	0.75	86.325	0.75		0.75	953.12	0.75		0.75	2.46	0.75	0.75				0.75	2.17		0.75	14.415	0.75	0.75		0.75	0.75		1.4			6.175	235.19	37.235			6.175	26.775	0.75	10.11		12.5
NHP - IL17A (39)	0	0.65	0.65	1.48	0.65	0.65	0.65	0.65	0.65	0.65	0.65	1.06	0.65	4.085	6.68	0.65	0.65	0.65	0.65	0.65	0.65	0.65	0.65	0.65	0.65	0.65	0.74	0.65	0.65	0.65	0.65		0.65	0.65	0.65	0.65	0.425	0.65	0.65	0.65	0.65	0.65	0.65	0.65	0.65	0.65	0.65	0.65	0.65
	1	0.65	0.65	0.65	0.65	0.65	0.65	0.65	0.65	0.65	0.65	0.65	0.65	1.675	3.62	0.65	0.65	0.65	0.65	0.65	0.65	0.65	0.65	0.65	0.65	0.65	0.845	0.65	0.65	0.65	0.41		0.555	0.305	0.65	0.15	0.305	0.65	0.65	0.4	0.65	0.65	0.65	0.65	1.335	0.9	0.65	0.905	0.65
	4	0.65	0.65	0.65	0.65	0.65	0.65	0.65	0.65	0.65	0.65	0.65	0.65	0.46	1.91	0.65	0.65	0.65	0.65	0.65	0.65	0.65	0.65	0.65	0.65	0.65	0.65	0.65	0.65	0.65	0.65		0.65	0.65	0.65	0.65	0.65	0.65	0.65	0.65	0.65	0.65	0.65	0.65	0.65	0.65	0.65	0.425	0.65
	5	0.65	0.65	0.65	0.65	0.65	0.565	0.65	0.65	0.65	0.65	0.65	0.65	1.64	2.885	0.65	0.65	0.65	0.65	0.65	0.65	0.65	0.65	0.65	0.65	0.65	0.98	0.65	0.65	0.65	0.65		0.65	0.335	0.65	0.65	0.38	0.65	0.65	0.54	0.38	0.65	0.65	0.11	0.65	1.065	0.65	0.665	0.38
	8	0.65	0.65	0.65	0.65	0.65	0.65	0.65	0.65	0.65	0.65	0.65	0.65	1.48	2.13	0.65	0.65	0.65	0.65	0.65	0.65	0.65	0.65	0.65	0.65	0.65	0.65	0.65	0.65	0.65	0.65		0.65	0.76	0.65	0.65	0.61	0.65	0.65	0.65	0.555	0.65	0.705	0.4	0.305	1.625	0.555	0.995	0.46
	10	1.35	0.65	1.89	0.65	0.65	0.685	0.36	0.36	0.65	0.65	0.65	0.65	2.37	2.37	0.65	0.65	0.65	0.65	0.65	0.65	0.65	0.65	0.65	0.65	0.65	1.23	0.65	0.65	0.65	0.65		0.65	1.19	0.65	0.65	0.11	0.65	0.65	0.38	0.605	0.11	0.605	0.54	0.335	2.445	0.81	1.05	0.65
	14		0.65	0.48	0.65	0.65	0.65	0.65	0.65	0.65	0.65	0.65		1.44	2.285	0.65		0.65	0.65	0.65	0.65				0.65	0.65		0.65	0.65	0.65	0.65		0.65	0.65		0.65			0.65	0.38	0.65			0.295	0.65	0.295	0.65		0.65
NHP - IL18 (78)	0	3.05	3.05	2.79	3.05	3.05	3.05	3.05	3.05	3.05	3.05	3.05	3.05	3.05	52.235	15.87	3.05	3.05	3.05	3.05	3.05	3.05	3.05	3.05	3.05	3.05	3.05	3.05	3.05	3.05	3.05		3.05	2.415	3.05	3.05	3.05	3.05	1.64	3.05	3.05	3.05	3.05	3.05	3.05	3.05	3.05	3.05	3.05
	1	3.05	3.05	3.05	3.05	3.05	3.05	3.05	3.05	3.05	3.05	3.05	3.05	3.05	59.285	3.05	3.05	3.05	3.05	3.05	3.05	3.05	3.05	3.05	3.05	3.05	3.05	3.05	3.05	3.05	3.05		3.05	3.05	3.05	3.05	3.05	3.05	3.05	3.05	3.05	3.05	3.05	3.05	3.05	3.05	3.05	3.05	3.05
	4	3.05	3.05	3.05	3.05	3.05	3.05	3.05	3.05	3.05	3.05	3.05	3.05	3.05	23.33	3.05	3.05	3.05	3.05	3.05	3.05	3.05	3.05	3.05	3.05	3.05	3.05	3.05	3.05	3.05	3.05		3.05	8.415	3.05	3.05	3.05	2.415	3.05	3.05	3.05	0.23	3.05	3.05	3.05	1.64	3.05	3.05	3.05
	5	3.05	3.05	202.13	3.05	2.64	3.05	3.05	3.05	3.05	3.05	3.05	3.05	3.05	48.565	102.65	3.05	3.05	3.05	3.05	3.05	3.05	3.05	3.05	3.05	3.05	3.05	3.05	3.05	3.05	3.05		3.05	45.895	3.05	3.05	10.76	11.585	3.05	289.96	3.05	1.81	3.05	3.05	3.05	6.315	3.05	3.05	3.05
	8	55.525	3.05	1232.49	71.54	22.92	3.05	3.05	3.05	24.025	3.05	16.235	3.05	3.05	66.22	74.745	3.05	1.565	2.79	1.565	43.675	7.19	3.05	1.565	3.05	3.05	3.05	3.05	3.05	3.05	3.05		7.05	25.305	11.63	2.99	18.24	63.24	24.245	294.695	53.31	1.94	3.05	3.05	3.05	26.31	3.05	3.05	3.05
	10	48.83	7.77	538.66	60.425	27.075	2.675	3.05	3.05	10.06	3.05	22.47	3.05	2.3	50.215	44.18	2.3	0.5	8.685	7.775	20.62	27.995	1.775	15.105	2.3	3.05	3.05	5.945	3.05	3.05	2.675		15.645	44.435	6.485	3.05	13.025	51.975	41.665	138.13	43.095	14.76	4.58	3.05	3.05	34.525	2.88	3.05	3.05
	14		3.05	86.095	3.05	3.05	3.05	3.05	3.05	3.05	3.05	3.05		3.05	33.7	3.05		3.05	3.05	3.05	3.05				3.05	3.05		3.05	3.05	3.05	3.05		3.05	6.465		3.05			5.24	29.74	3.05			3.05	3.05	3.05	3.05		3.05
NHP - MCP-1 (67)	0	272.515	243.84	340.51	492.04	438.545	377.775	370.605	576.61	369.275	268.405	236.935	359.805	528.195	420.46	679.35	416.155	470.265	435.42	226.67	412.065	426.275	363.395	14.725	453.575	345.14	330.245	623.72	832.46	372.64	358.575		435.265	270.255	213.61	299.19	270.795	283.12	407.88	299.49	407.925	200.96	190.13	201.91	240.795	150.62	255.47	177.1	219.505
	1	175.72	202.015	194.78	313.305	220.145	303.91	251.965	374.61	280.725	151.175	164.6	195.98	351.44	315.95	325.325	279.635	334.3	321.3	215.86	399.74	246.655	242.515	9.91	327.935	269.23	242.24	322.035	457.44	304.805	294.505		469.845	257.165	255.48	413.37	262.44	290.52	641.045	352.8	427.075	249.94	212.77	293.935	378.16	184.795	245	289.285	365.77
	4	233.5	335.21	426.9	366.69	374.2	749.2	322.145	816.94	363.565	247.97	139.235	260.86	377.75	423.59	431.895	469.675	642.015	432.81	418.36	549.205	202.1	290.98	12.935	381.04	252.17	359.195	342.54	549.525	475.035	376.845		295.135	250.825	231.22	298.81	276.765	286.325	408.49	311.91	383.565	263.925	236.03	296.385	288.775	165.505	343.63	246.24	361.79
	5	291.515	336.075	1034.07	451.115	536.24	681.745	429.75	1287.24	388.055	341.795	170.61	331.38	512.68	471.53	612.92	524.305	641.745	681.355	636.425	922.605	249.56	342.15	489.975	447.195	282.205	315.355	385.465	12.425	413.8	338.125		372.865	387.94	297.6	504.875	479.46	425.935	544.805	770.3	486.51	328.67	297.935	427.505	374.69	254.465	430.37	364.555	480.86
	8	274.915	430.615	738.99	386.905	388.535	465.825	345.85	618.975	444.07	292.17	194.45	287.37	471.11	405.275	492.35	421.615	487.735	554.83	409.11	632.52	331.895	280.545	18.45	356.535	272.895	236.525	418.37	453.625	297.62	339.955		424.24	289.025	307.13	386.135	320.28	473.87	610.585	411.75	536.05	464.45	257.94	478.235	367.11	272.24	337.56	258.385	384.535
	10	284.13	337.395	275.135	371.275	341.85	260.605	325.32	573.015	402.075	245.12	163.035	253.195	419.285	383.15	488.66	397.535	384.19	369.61	336.545	525.065	345.875	368.065	14.75	587.965	307.84	229.01	384.05	437.255	272.35	309.915		377.09	298.37	262.535	345.725	290.43	333.125	569.18	356.095	438.185	332.875	209.835	436.835	379.93	258.2	382.25	278.605	344.56
	14		264.725	218.58	331.775	325.65	204.79	346.82	398.685	348.575	200.24	123.52		325.555	291.985	326.87		277.745	287.755	256.81	367.77				281.1	225.16		348.99	301.605	198.525	224.01		271.285	186.855		311.35			404.76	283.48	287.225			325.065	258.85	161.505	227.215		225.965
NHP - MIP-1b (73)	0	0.8	2.835	16.04	0.8	0.8	0.8	0.8	0.88	2.63	0.8	2.17	0.8	1.385	183.13	5.87	1.385	0.8	1.97	1.715	3.775	2.17	0.8	0.8	0.8	1.97	2.17	1.97	1.385	0.8	0.8		16.945	0.8	0.8	0.8	0.8	0.8	0.8	0.8	0.8	0.8	0.8	0.8	0.8	0.8	0.8	0.8	0.8
	1	2.49	0.8	9.935	0.8	0.8	0.8	0.8	1.905	0.8	0.8	0.8	0.8	0.8	232.61	0.8	0.8	0.8	1.905	0.8	0.8	0.8	0.8	0.8	0.8	3.005	3.595	0.8	0.8	0.8	0.8		30.475	0.8	0.8	0.8	0.8	0.8	0.8	0.8	0.8	0.8	0.8	0.8	0.8	0.8	0.8	0.8	0.8
	4	0.8	5.715	9.61	0.8	0.8	0.8	0.8	0.8	0.8	0.8	0.8	0.8	0.8	184.275	0.8	0.8	0.8	0.8	0.8	0.8	0.8	0.8	0.8	0.8	0.8	0.88	0.8	0.8	0.8	0.8		5.52	0.8	0.8	0.8	0.8	0.8	0.8	0.8	0.8	0.8	0.8	0.8	0.8	0.8	0.8	0.8	0.8
	5	0.8	5.59	18.025	0.8	0.8	0.8	0.8	0.8	0.8	0.8	0.8	0.8	0.8	233.435	1.54	0.8	0.8	0.8	0.8	0.8	0.8	0.8	0.8	0.8	0.8	0.8	0.8	0.8	0.8	0.8		23.22	0.8	0.8	0.8	0.8	0.8	0.8	1.5	3.11	0.8	0.8	1.5	0.8	0.8	0.8	0.8	2.2
	8	0.8	9.555	15.53	0.8	1.715	1.715	0.8	2.63	1.715	0.8	2.86	0.8	1.715	242.36	3.775	0.8	1.715	4.92	0.8	0.8	4.92	0.8	0.8	0.8	2.86	0.8	0.8	0.8	0.8	0.8		13.055	0.8	0.8	0.8	0.8	0.8	0.8	0.8	0.8	0.8	0.8	0.8	0.8	0.8	0.8	0.8	0.8
	10	0.49	5.13	10.285	0.8	0.8	0.8	0.8	0.8	0.8	0.8	0.8	0.645	0.8	225.585	0.8	0.8	0.8	0.645	0.8	0.8	2.425	2.425	0.8	0.8	0.8	0.8	0.8	0.8	0.8	0.8		16.98	1.5	1.5	0.8	0.8	1.5	0.8	0.8	0.8	0.8	0.8	0.8	3.11	0.8	1.5	1.5	0.8
	14		1.385	5.35	0.8	0.8	0.8	0.8	0.8	0.8	0.8	0.8		0.8	224.275	1.905		1.905	1.905	0.8	0.8				0.8	0.8		0.8	0.8	0.8	0.8		22.015	0.8		0.8			0.8	0.8	0.8			0.8	0.8	0.8	3.325		0.8
NHP - MIP1a (65)	0	2.45	2.45	8.59	2.415	2.45	2.45	2.45	2.45	5.815	2.38	2.45	2.38	5.405	2.45	2.45	2.45	2.45	2.45	2.65	4.33	2.45	2.45	2.45	2.45	2.45	2.45	2.45	2.45	2.45	2.45		2.45	2.45	2.665	2.665	2.88	3.555	4.475	3.555	2.665	2.665	2.665	1.63	2.88	3.77	2.45	2.45	2.45
	1	4.365	3.465	4.81	6.445	5.71	7.99	4.81	4.81	7.345	4.365	6.61	7.345	9.95	8.725	5.71	6.61	5.71	5.71	6.185	5.71	6.61	7.345	6.445	5.71	5.71	8.08	5.71	5.135	6.61	5.71		2.195	4.06	1.94	3.465	2.195	2.195	1.94	3.21	2.195	3.465	2.45	3.21	5.015	3.21	2.195	2.67	2.45
	4	3.35	4.47	2.9	5.3	2.445	3.35	2.9	1.995	3.35	4.47	2.9	3.35	3.35	3.35	2.45	4.02	2.9	4.47	2.9	4.47	2.9	2.45	4.85	2.9	3.35	5.59	5.59	3.965	2.445	5.59		3.77	3.77	3.77	4.475	2.665	2.255	2.45	4.475	3.85	3.555	2.45	5.08	5.365	3.555	3.555	3.555	4.475
	5	2.585	2.45	2.72	4.13	2.45	2.72	2.45	2.45	2.585	2.585	2.45	2.45	5.81	2.585	2.45	2.585	2.45	2.585	4.13	2.45	2.585	2.45	2.45	2.45	2.585	2.585	4.13	2.45	2.45	2.45		3.61	2.51	4.335	5.52	2.48	4.365	6.415	6.22	2.48	6.22	8.3	5.52	2.45	4.365	2.45	4.335	2.48
	8	2.45	2.45	6.21	2.45	3.39	4.33	2.45	2.45	2.45	2.45	2.45	2.45	5.385	2.45	2.45	2.45	3.39	2.45	3.39	2.45	2.45	2.45	3.39	2.45	2.45	3.39	3.39	2.45	2.45	2.45		3.465	3.21	2.195	4.06	4.06	2.195	2.195	2.195	3.465	2.195	3.465	3.21	2.195	6.88	4.315	3.21	3.465
	10	7.57	8.86	11.39	7.57	6.515	8.42	7.57	3.785	6.515	6.515	6.515	6.515	11.995	2.11	8.795	3.785	6.58	7.57	7.57	5.46	6.515	5.46	6.515	7.57	6.515	6.515	7.57	7.365	6.515	6.515		2.51	2.51	2.51	2.48	2.48	2.51	2.51	6.22	7.375	4.985	6.22	7.375	7.375	9.455	6.445	8.3	4.365
	14		2.45	2.415	2.45	2.45	2.415	2.45	2.45	2.45	5.71	6.61		7.99	7.725	4.81		6.78	6.78	7.345	4.02				4.47	5.3		4.02	5.59	4.47	4.47		5.3	2.45		4.13			4.265	2.585	2.72			2.585	2.45	2.585	4.445		2.45
NHP - TGFa (15)	0	7.365	12.91	8.985	1.16	10.185	4.355	8.45	10.615	10.14	14.545	18.5	1.58	11.93	54.155	7.92	5.645	5	15.425	1.13	8.28	29.155	12.36	5.43	6.505	37.25	12.145	6.505	13.02	2.215	5.86		2.265	4.64	5.88	3.74	4.1	8.155	8.845	0.84	2.725	9.02	3.645	1.225	1.51	1.51	5.435	5.35	0.64
	1	0.37	0.55	0.55	0.55	0.685	1.845	2.165	0.37	1.62	2.685	1.735	0.63	3.615	21.52	1.845	0.55	1.405	5.68	0.63	2.49	7.86	2.38	1.845	1.845	10.955	6.815	0.865	3.105	0.505	3.31		4.755	5.315	5.5	6.435	3.82	3.065	10.515	2.5	6.435	10.515	5.5	4.385	8.1	3.535	5.87	13.28	4.57
	4	1.88	5.24	3.87	1.475	3.475	1.27	2.48	4.07	1.47	2.68	1.88	1.68	2.48	17.27	1.065	0.705	0.495	5.045	0.44	3.675	16.33	3.87	5.24	4.065	15.41	9.975	1.68	4.655	0.55	1.88		1.51	1.685	1.31	3.37	1.32	2.63	3.555	5.35	1.7	4.455	2.825	2.455	0.93	1.7	6.41	1.5	1.03
	5	1.1	0.775	0.5	1.07	1.95	0.55	4.36	1.395	1.675	0.55	2.8	0.55	0.45	18.3	0.55	0.55	0.55	2.245	0.55	1.395	7.515	0.775	0.775	0.55	8.45	0.45	0.5	1.395	0.55	0.55		0.855	3.6	2.03	5.13	1.445	3.6	5.99	10.585	3.155	6.305	4.48	3.16	2.02	1.435	7.47	4.48	1.175
	8	0.55	2.295	0.625	0.55	0.55	0.55	0.55	0.55	0.55	0.625	0.55	0.55	0.55	19.995	0.625	0.55	0.625	0.55	0.55	0.55	8.515	0.55	2.62	0.7	5.08	0.55	0.625	0.55	0.55	0.55		0.58	3.065	2.215	2.025	1.455	1.55	2.875	2.495	1.545	2.875	2.31	1.36	1.36	2.31	4.195	10.33	0.97
	10	2.125	0.4	1.52	0.55	0.92	0.25	0.55	0.4	0.4	0.25	0.885	0.55	0.585	15.225	0.55	0.55	0.55	3.17	0.55	0.55	1.22	0.55	0.585	0.55	5.955	0.55	0.55	0.55	0.55	0.4		0.55	5.775	4.7	3.155	0.595	0.735	2.03	3.16	2.03	5.345	8.52	1.45	2.26	3.38	6.2	7.05	1.09
	14		2	0.55	0.735	1.79	1.37	4.57	1.58	0.43	7.115	10.975		5.105	23.87	2.9		5.59	3.31	1.405	1.675				6.02	21.955		4.065	4.36	2.08	6.215		0.65	2.8		6.33			2.51	8.21	1.07			0.55	0.775	2.51	4.01		0.55
NHP - TNFa (72)	0	1.505	0.8	30.32	7.82	1.505	5.53	2.21	18.69	0.8	0.8	1.505	1.505	1.505	434.96	7.82	4.825	0.8	0.8	1.69	0.8	1.505	5.53	1.505	0.8	1.505	0.8	0.8	7.82	0.8	0.8		10.03	0.8	0.8	0.83	0.8	0.8	0.8	0.83	0.8	0.8	0.83	0.8	0.8	0.83	4.885	0.8	0.83
	1	1.12	0.8	5.85	3.34	1.12	0.8	1.44	1.12	2.555	1.44	1.12	0.8	8.07	190.735	3.66	3.66	1.12	3.66	1.12	1.44	1.44	1.12	0.8	0.8	5.53	3.34	0.8	1.12	0.8	3.34		14.635	0.8	0.8	1.425	0.8	0.8	6.25	1.425	4.705	2.05	5.33	3.105	0.8	4.705	0.8	0.8	1.425
	4	0.8	0.8	2.57	0.8	0.8	0.8	0.8	0.8	0.8	0.8	0.8	0.8	0.8	170.26	0.8	0.8	0.8	0.8	0.8	0.8	0.8	0.8	0.8	0.8	0.8	0.8	0.8	0.8	0.8	0.8		9.025	0.8	0.8	0.8	0.86	0.83	4.885	0.86	2.84	0.8	0.8	1.8	0.8	0.8	0.8	0.83	0.8
	5	2.62	0.8	17.59	1.71	1.71	0.8	1.71	0.8	0.8	1.71	2.62	4.225	4.225	168.395	0.8	0.8	0.8	0.8	1.71	1.71	4.225	0.8	1.71	1.71	1.71	2.62	1.71	0.8	3.88	1.71		10.595	0.8	0.8	6.27	2.035	0.8	2.035	6.27	2.035	6.27	2.035	6.27	6.445	0.8	0.8	0.8	0.8
	8	1.69	1.69	33.185	1.69	0.8	1.69	0.8	0.8	0.8	2.58	0.8	0.8	0.8	224.54	0.8	0.8	5.895	0.8	0.8	1.69	0.8	0.8	0.8	0.8	3.385	0.8	0.8	0.8	0.8	1.69		8.61	0.8	5.33	0.8	3.73	0.8	0.8	0.8	8.61	1.425	3.105	1.425	5.33	1.425	5.33	4.705	4.705
	10	19.26	12.765	36.73	10.625	12.765	19.26	10.61	14.92	14.93	14.92	10.625	12.765	19.25	148.125	19.26	12.765	17.085	10.625	17.105	14.92	8.47	13.84	9.535	12.765	21.425	10.625	8.47	12.765	10.61	14.93		9.27	2.035	0.8	0.8	0.8	2.035	0.8	0.8	5.035	0.8	0.8	7.82	2.035	7.82	6.445	17.51	5.035
	14		1.505	36.39	0.8	2.21	14.84	0.8	1.505	0.8	0.8	0.8		1.12	121.26	0.8		3.34	0.8	3.66	0.8				0.8	0.8		0.8	0.8	0.8	0.8		2.57	5.135		1.71			4.225	4.225	7.65			1.34	0.8	0.8	1.69		5.005
NHP - VEGF (76)	0	46.085	28.955	24.565	54.085	37.47	68.41	4.395	64.35	14.005	46.085	55.735	72.35	64.35	87.17	71.305	24.555	37.47	72.35	14.91	21.21	33.17	14.905	72.35	64.35	55.735	55.735	55.735	47.12	64.35	37.47		132.675	6.8	11.39	6.8	31.695	6.8	6.8	6.8	6.8	6.8	6.8	6.8	6.8	6.8	11.39	6.8	6.8
	1	6.8	6.8	14.71	6.8	8.04	15.95	14.71	6.8	8.04	8.04	6.8	15.95	32.85	38.255	9.28	11.63	8.04	14.71	8.04	15.95	14.71	8.04	9.28	9.28	20.115	15.95	15.95	14.71	11.63	9.28		152.885	8.25	6.8	8.25	57.235	8.25	6.8	6.8	8.25	6.8	6.8	6.8	6.8	8.25	8.25	6.8	6.8
	4	2.62	4.71	6.8	2.62	6.8	13.515	4.71	15.605	4.71	6.8	4.71	4.71	13.515	31.685	2.62	6.8	6.8	4.71	4.71	6.8	6.8	6.8	15.605	4.71	6.8	15.605	6.8	6.8	15.605	4.71		121.62	6.8	6.8	6.8	6.8	6.8	6.8	6.8	11.39	11.39	6.8	11.39	6.8	36.43	6.8	6.8	11.39
	5	8.57	10.34	6.8	8.57	6.8	37.205	8.57	25.36	8.57	14.35	24.075	8.57	31.585	54.28	10.34	10.34	6.8	8.57	25.36	6.8	10.34	8.57	6.8	6.8	14.35	17.85	24.075	17.85	17.85	6.8		108.49	25.15	22.35	6.8	48.42	25.15	31.525	7.385	15.975	31.525	15.975	37.9	16.56	22.35	7.385	15.975	25.15
	8	14.91	7.705	12.005	8.61	14.91	21.21	14.005	7.705	14.005	8.61	6.8	14.91	26.31	24.565	8.61	6.8	7.705	7.705	6.8	6.8	19.105	7.705	7.705	19.105	18.305	14.91	6.8	6.8	7.705	7.705		87.49	6.8	6.8	6.8	80.42	6.8	6.8	6.8	6.8	6.8	6.8	6.8	6.8	8.25	6.8	6.8	8.25
	10	16.47	9.39	23.55	20.29	8.095	23.55	16.47	16.47	23.55	9.39	23.55	8.095	54.58	58.52	15.175	16.47	23.55	9.39	8.095	23.55	19.43	16.47	29.675	15.175	16.47	29.265	15.175	16.47	20.89	23.55		112.105	22.935	25.15	7.385	48.93	25.15	22.935	25.15	27.735	7.385	25.15	22.35	6.8	43.415	7.97	16.56	31.525
	14		55.735	24.555	55.735	47.12	95.49	46.085	47.12	46.085	8.04	8.04		30.64	47.54	6.8		20.115	8.04	6.8	15.605				6.8	4.71		6.8	20.79	2.62	6.8		125.905	25.36		8.57			14.35	17.85	10.34			31.585	17.85	24.075	6.8		21.21
[truncated: 2 more columns]
